# Supplementary material for: A promising nonlinear optical material in the Mid-IR region: new results on synthesis, crystal structure and properties of noncentrosymmetric β-HgBrCl
Source: Royal Society of Chemistry journal article supplement (doi:10.1039/c3dt50291k), 2013-01-01
Supplement: c3dt50291k.pdf [file c3dt50291k.pdf]

## Electronic Supplementary Information for:

# A Promising Nonlinear Optical Material in the Mid-IR Region: New Results on Synthesis, Crystal Structure and Properties of Noncentrosymmetric $\beta$ -HgBrCl

Yangyang Dang,<sup>a</sup> Xianggao Meng,<sup>b</sup> Kui Jiang,<sup>a</sup> Cheng Zhong,<sup>a</sup> Xingguo Chen<sup>a</sup> and Jingui Qin\*<sup>a</sup>

<sup>a</sup>Department of Chemistry, Wuhan University, Wuhan 430072, China.

<sup>b</sup>College of Chemistry, Central China Normal University, Wuhan, 430079, China.

### Captions for tables and figures in the ESI

**Table S1** Selected bond lengths (Å) and angles (deg) for HgCl<sub>2</sub>.<sup>1</sup>

**Table S2** Selected bond lengths (Å) and angles (deg) for HgBr<sub>2</sub>.<sup>2</sup>

**Table S3** The proportion of element in  $\alpha$ -HgBrCl by EDX

**Table S4** The proportion of element in  $\beta$ -HgBrCl by EDX

**Fig. S1** The EDX spectrum of  $\alpha$ -HgBrCl.

**Fig. S2** The EDX spectrum of  $\beta$ -HgBrCl.

**Fig. S3** Calculated and experimental powder X-ray diffraction patterns for  $\alpha$ -HgBrCl and  $\beta$ -HgBrCl.

**Fig. S4** The photograph of  $\alpha$ -HgBrCl crystals.

**Fig. S5** The photograph of  $\beta$ -HgBrCl crystals.

**Table S1** Selected bond lengths (Å) and angles (deg) for HgCl<sub>2</sub>.<sup>1</sup>

| bond     | bond length<br>(Å) | bond           | Bond angle<br>(deg) |
|----------|--------------------|----------------|---------------------|
| Hg-Cl(1) | 2.2913             | Cl(1)-Hg-Cl(2) | 178.604             |
| Hg-Cl(2) | 2.2734             |                |                     |

**Table S2** Selected bond lengths (Å) and angles (deg) for HgBr<sub>2</sub>.<sup>2</sup>

| bond     | bond length<br>(Å) | bond           | Bond angle<br>(deg) |
|----------|--------------------|----------------|---------------------|
| Hg-Br(1) | 2.4446             | Br(1)-Hg-Br(2) | 179.881             |
| Hg-Br(2) | 2.4447             |                |                     |

**Table S3** The proportion of element in  $\alpha$ -HgBrCl by EDX

| Element     | Experimental values |                 |
|-------------|---------------------|-----------------|
|             | Weight/%            | Atomic weight/% |
| Hg <i>L</i> | 63.14               | 31.27           |
| Br <i>K</i> | 22.17               | 27.56           |
| Cl <i>K</i> | 14.69               | 41.17           |

**Table S4** The proportion of element in  $\beta$ -HgBrCl by EDX

| Element     | Experimental values |                 |
|-------------|---------------------|-----------------|
|             | Weight/%            | Atomic weight/% |
| Hg <i>L</i> | 59.84               | 30.93           |
| Br <i>K</i> | 29.73               | 38.57           |
| Cl <i>K</i> | 10.43               | 30.51           |

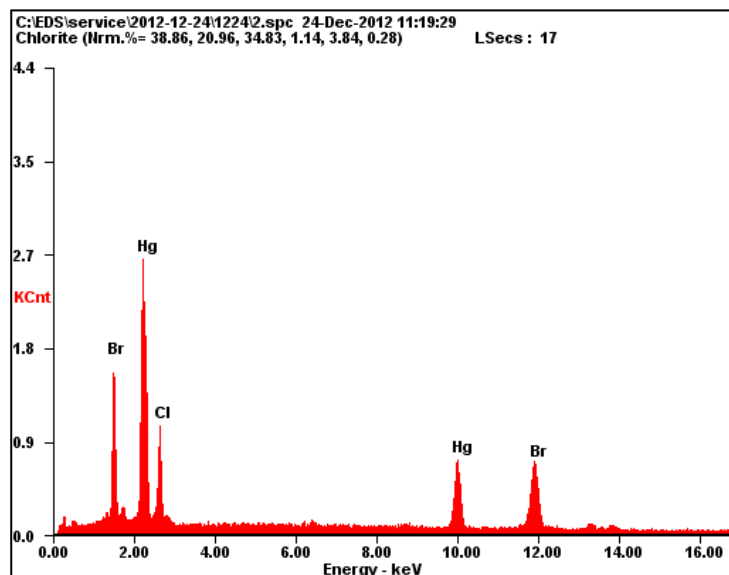

**Fig. S1** The EDX spectrum of  $\alpha$ -HgBrCl

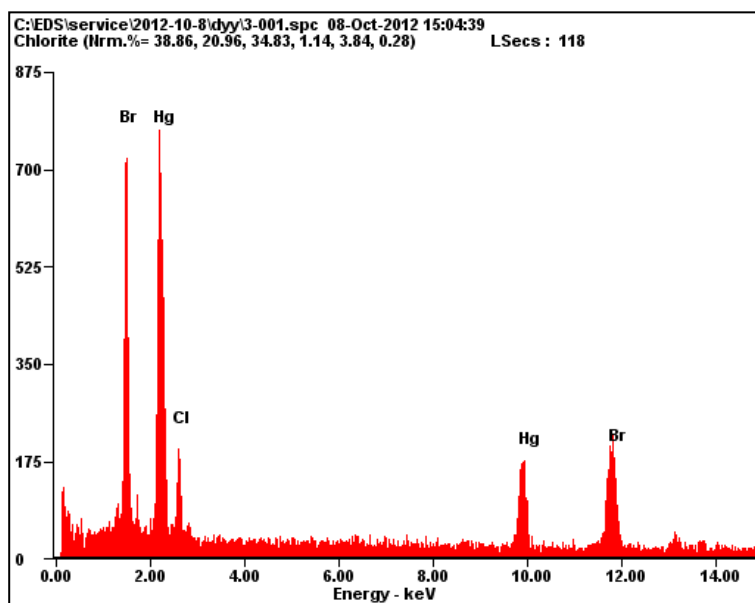

**Fig. S2** The EDX spectrum of  $\beta$ -HgBrCl

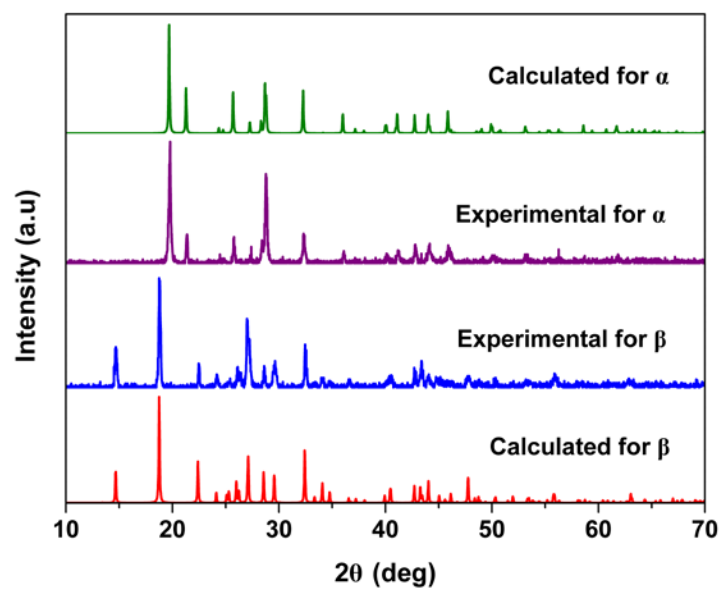

**Fig. S3** Calculated and experimental powder X-ray diffraction patterns for  $\alpha$ -HgBrCl and  $\beta$ -HgBrCl.

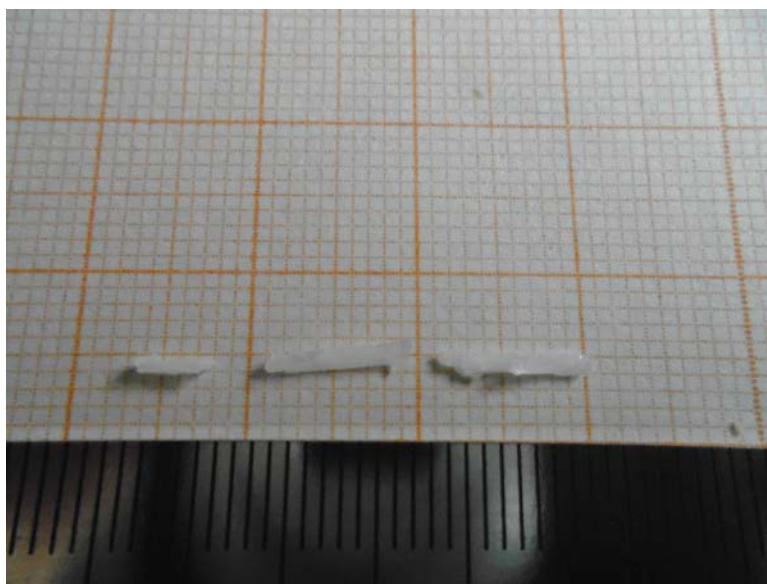

**Fig. S4** The photograph of  $\alpha$ -HgBrCl crystals.

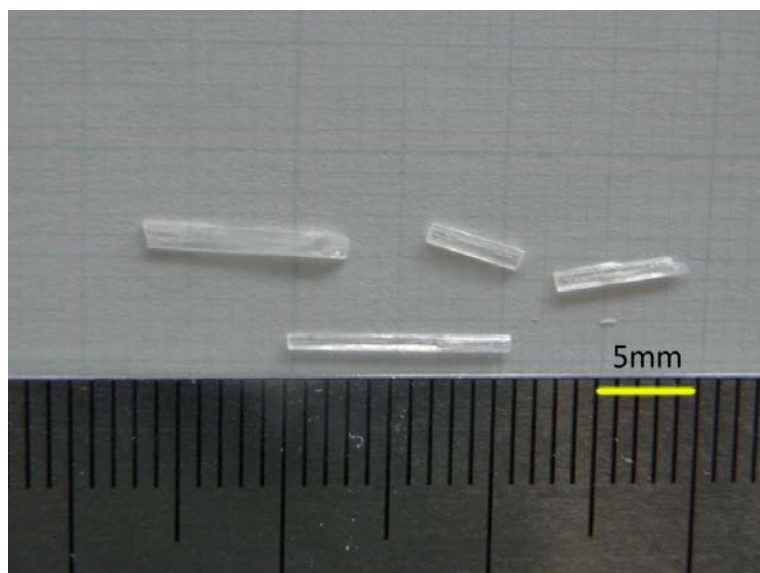

**Fig. S5** The photograph of  $\beta$ -HgBrCl crystals.

## References

1. V. Subramanian, K. Seff, *Acta Crystallographica B*, 1980, **36**, 2132.
2. V. I. Pakhomov, A. V. Goryunov, I. N. Ivanova-Korfini, A. A. Boguslavskii, R. Sh. Lotfullin, *Zhurnal Neorganicheskoi Khimii*, 1990, **35**,2476.
